# Supplementary material
Source: PubMed Central journal article supplement (PMC1838669)

PC Mito Mda1 merged

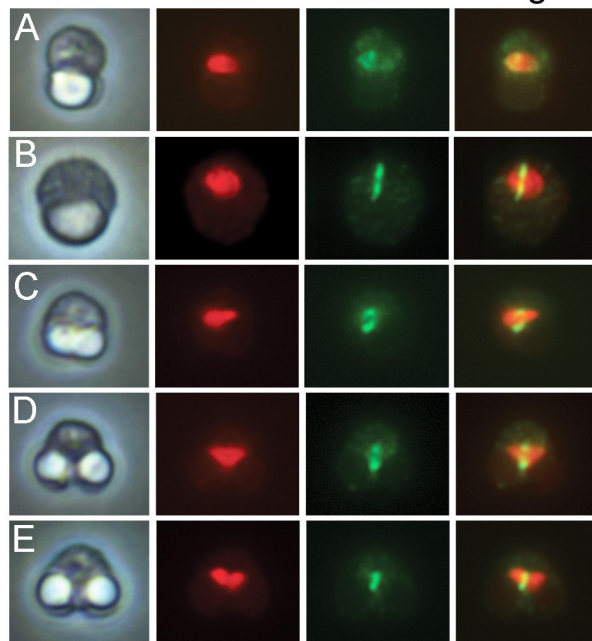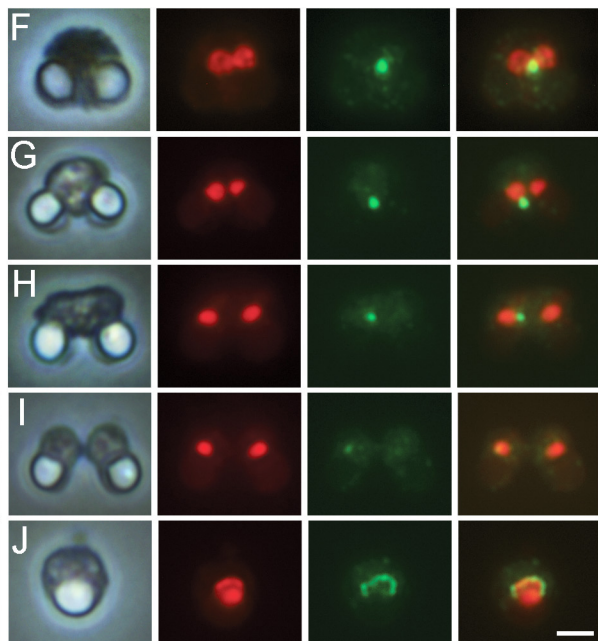

PC Dnm1 Mda1 merged

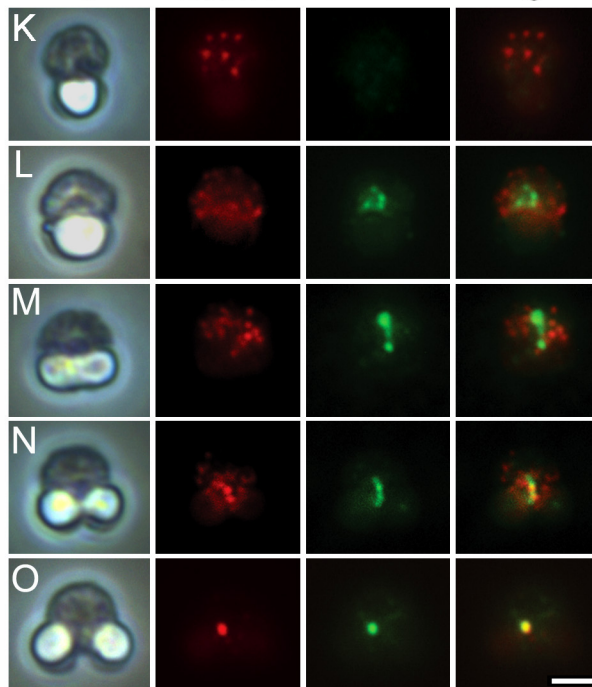

PC FtsZ1 Mda1 merged

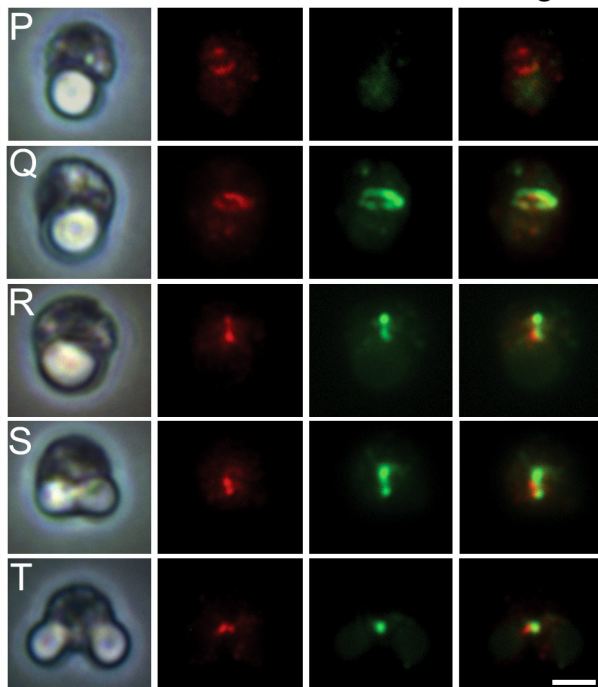

Supplement: pnas_0609364104_2.pdf [file pnas_0609364104_2.pdf]
